# Supplementary material
Source: Springer Nature journal article supplement (https://www.springerprofessional.de/resource/supplementary/13638_2011_473_MOESM4_ESM.pdf/11897796)

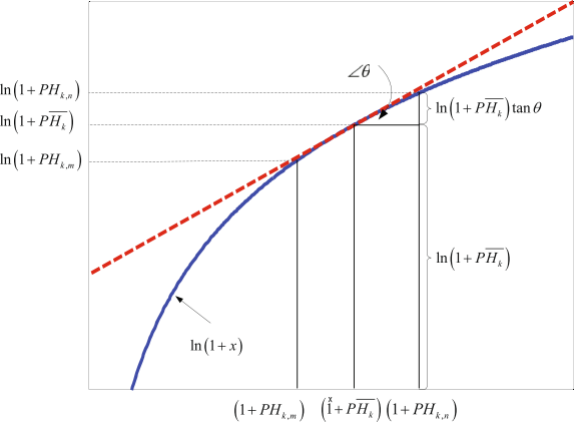

Supplement: MOESM4 [file 11897796]
